# Supplementary material for: A phase Ib, open-label, dose-escalation trial of the anti-CD37 monoclonal antibody, BI 836826, in combination with gemcitabine and oxaliplatin in patients with relapsed/refractory diffuse large B-cell lymphoma
Source: PubMed Central journal article supplement (PMC8279964; doi:10.1007/s10637-020-01054-6), 2021-02-01
Supplement: 10637_2020_1054_MOESM1_ESM.pdf [file 10637_2020_1054_MOESM1_ESM.pdf]

**Supplementary Table 1** Important protocol deviations

| Protocol deviation                                                                 | Patients*, n |
|------------------------------------------------------------------------------------|--------------|
| Entrance criteria not met                                                          |              |
| Efficacy-related entrance criteria not met                                         | 4            |
| Patient did not have trial diagnosis or was not part of target population          | 1            |
| Patient had a condition that may have caused additional risk from trial medication | 1            |
| Trial medication and randomization                                                 |              |
| Delayed BI 836826 administration                                                   | 3            |
| Delayed GemOx administration                                                       | 1            |
| Concomitant medication                                                             |              |
| Prohibited medication                                                              | 1            |

\*Three patients were identified with more than 1 protocol deviation: 1) did not have a CT scan with involvement of at least 1 bi-dimensional lesion/node >1.5 cm and delayed administration of BI 836826 in Cycle 1; 2) prior history of malignancy other than DLBCL and took prednisone for lymphoma, which was prohibited by the CTP; 3) HBV infection at the start of treatment, GemOx infusion on Day 2 instead of Day 1 of Cycle 1, and BI 836826 administration delayed in Cycle 1
